# Supplementary material
Source: HighWire-hosted journal article supplement (https://gut.bmj.com/content/67/4/616)
Supplement: inline-supplementary-material-1 [file inline-supplementary-material-1.pdf]

## Supplementary table: Outcome of patients with dysplasia in random biopsies

### Patients with dysplasia only in random biopsies (n=12)

|        | Pts | Personal history of IEN | PSC | Grade/site of IEN at colonoscopy | Tubular colon | Surgical findings/site of neoplasia | Endoscopic surveillance findings to study conclusion/site of neoplasia |
|--------|-----|-------------------------|-----|----------------------------------|---------------|-------------------------------------|------------------------------------------------------------------------|
| UF-LGD | 1   | -                       | -   | LGD/RC                           | -             |                                     | ALM-LGD/LC                                                             |
|        | 2   | -                       | -   | LGD/R                            | -             |                                     | ALM-LGD/LC                                                             |
|        | 3   | -                       | -   | LGD/Sig                          | -             |                                     | ALM-LGD/RC                                                             |
|        | 4   | -                       | -   | LGD/Sig                          | -             |                                     | no IEN                                                                 |
|        | 5   | +                       | -   | LGD/Sig                          | -             |                                     | no IEN                                                                 |
|        | 6   | -                       | -   | LGD/Sig                          | +             |                                     | no IEN                                                                 |
|        | 7   | -                       | +   | LGD/RC                           | -             |                                     | no IEN                                                                 |
|        | 8   | +                       | -   | LGD/R                            | -             |                                     | lost of follow-up                                                      |
| MF-LGD | 9   | +                       | -   | LGD/Sig, R, R                    | -             |                                     | CCR/R                                                                  |
|        | 10  | -                       | -   | LGD/TC, LC, Sig                  | +             | MF-LGD + HGD/LC, Sig                |                                                                        |
|        | 11  | +                       | +   | LGD/LC, Sig                      | -             | MF-LGD                              |                                                                        |
| UF-HGD | -   |                         |     |                                  |               |                                     |                                                                        |
| MF-HGD | 12  | +                       | -   | HGD/RC, TC                       | -             | MF-LGD + HGD/RC                     |                                                                        |

### Patients with dysplasia in both random and targeted biopsies (n=7)

|                              |    |   |   |                                      |   |                         |  |
|------------------------------|----|---|---|--------------------------------------|---|-------------------------|--|
| UF-LGD + LGD lesions         | 13 | + | + | LGD/Sig<br>ALM/Sig                   | - | MF-LGD/Sig              |  |
|                              | 14 | + | - | LGD/RC<br>2 ALM/RC                   | - | MF-LGD + HGD/RC         |  |
| UF-LGD + HGD lesions         | 15 | + | + | LGD/R<br>ALM/RC                      | + | MF-LGD+HGD<br>2CCR/LC   |  |
|                              | 16 | - | + | LGD/LC<br>ALM/TC<br>DALM/RC          | + | lost of follow-up       |  |
| MF-LGD + LGD lesions         | 17 | + | - | LGD/R<br>DALM/R                      | - | MF-LGD/Sig, R           |  |
| UF-HGD + LGD/HGD lesions     | 18 | + | - | HGD/R<br>2 ALM/Sig                   | - | MF-LGD/Sig, R           |  |
| MF-LGD/HGD + LGD/HGD lesions | 19 | + | - | LGD/HGD/RC,<br>TC, LC<br>DALM/RC, FC | + | MF-LGD + HGD/RC, TC, LC |  |

IEN, intraepithelial neoplasia, ie. dysplasia; PSC, primary sclerosing cholangitis; UF, unifocal; MF, multifocal; LGD, low-grade dysplasia; HGD, high-grade dysplasia; RC, right

colon; TC, transverse colon; LF, left colon; Sig, sigmoid colon; R, rectum; CRC, colorectal cancer; ALM, adenoma-like mass; DALM, dysplasia-associated lesion or mass.
